# Supplementary material
Source: publisher figshare collection journal article supplement (https://diabetesjournals.figshare.com/articles/dataset/_/25418539)

Figure 3A

WT-AL

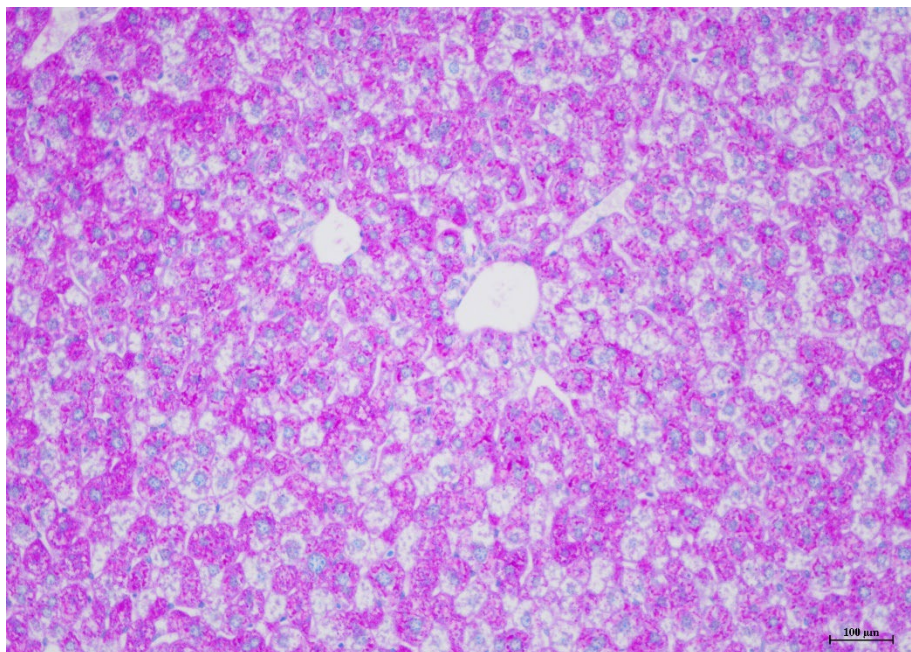

DB-AL

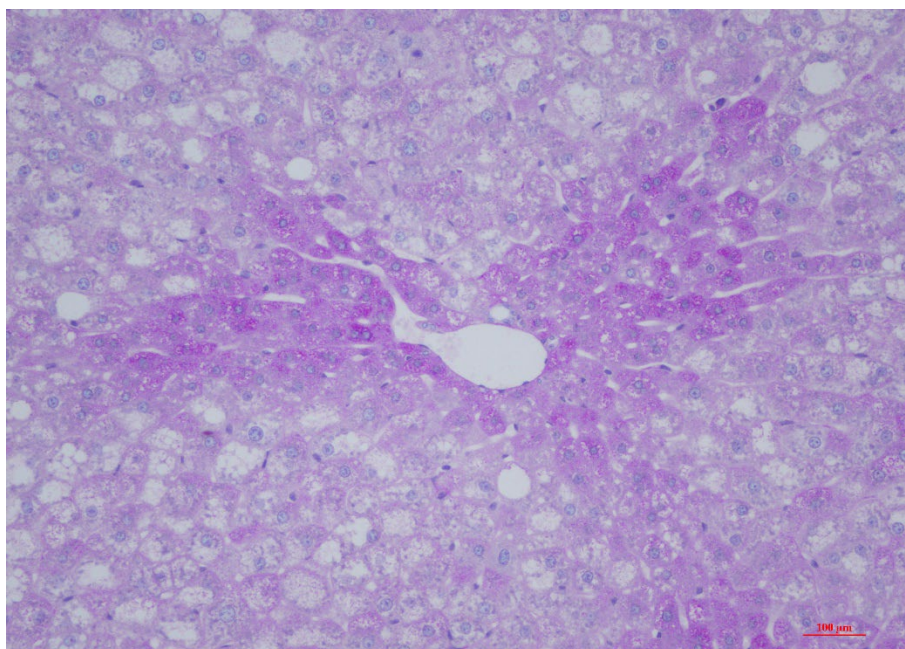



DB-MF

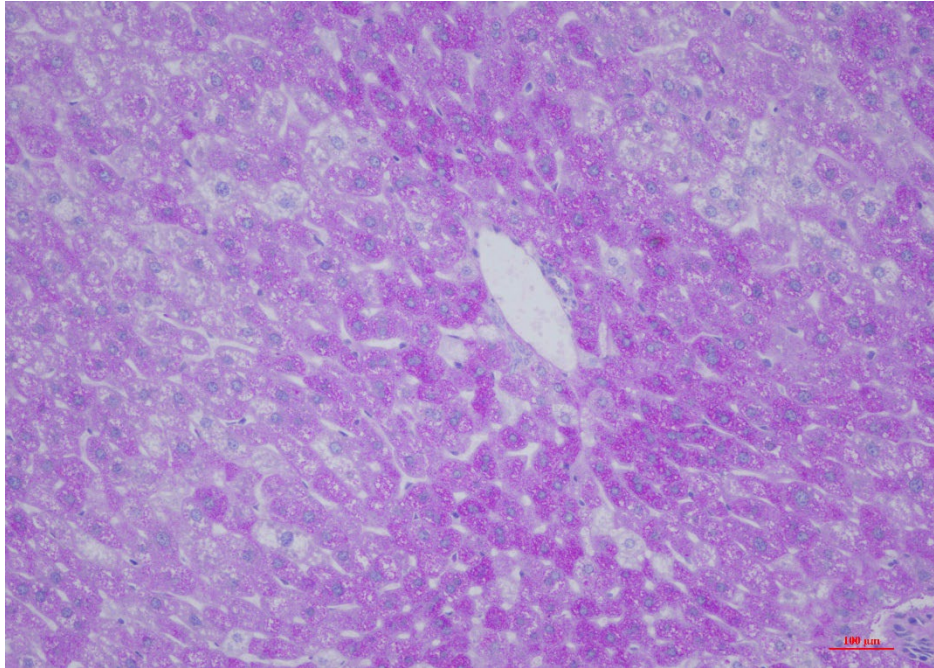

DB-EODF

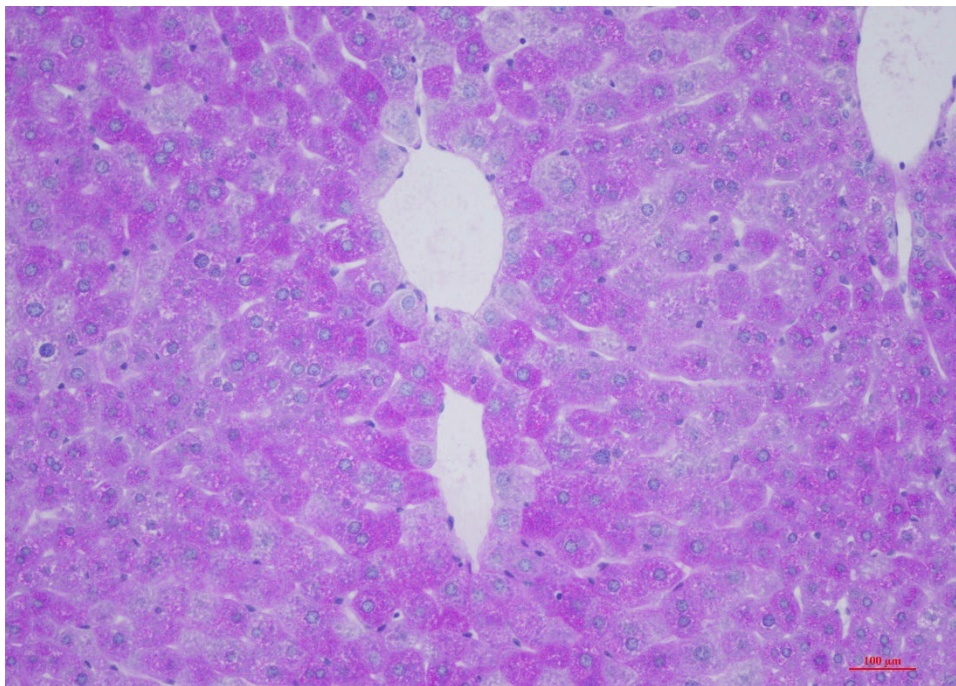

Figure 3C

PYGL:

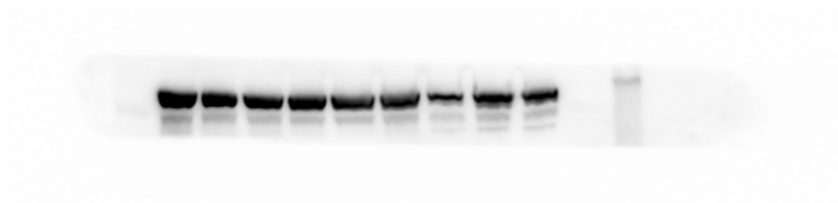

GYS2:

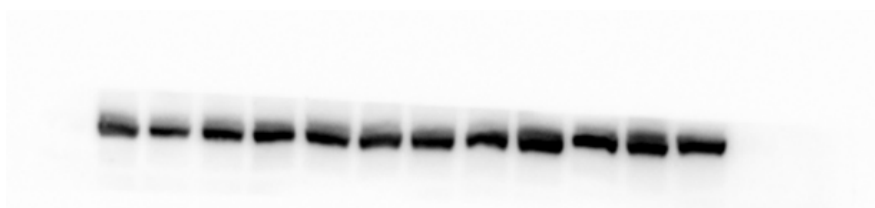

Actin:

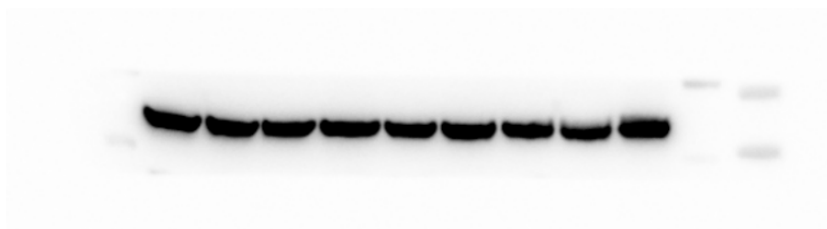

Figure 3G

pAKT:

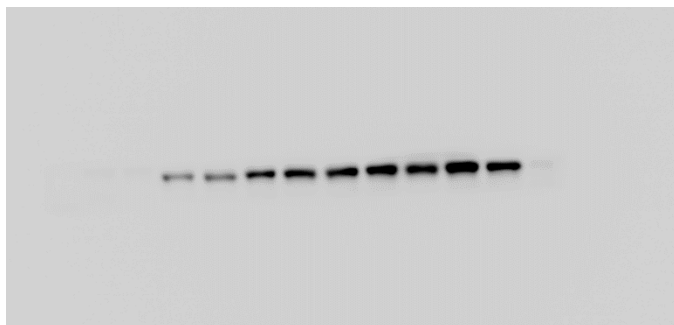

AKT:

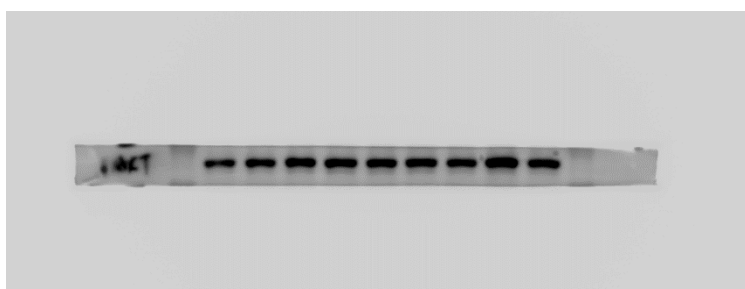

Actin

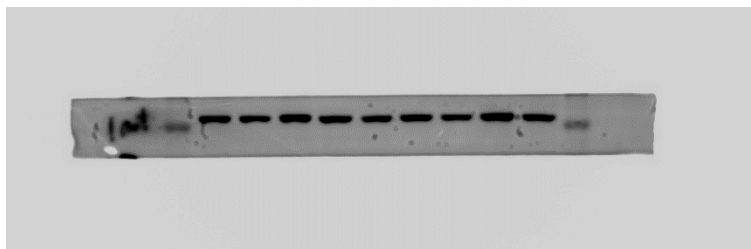

pFOXO1

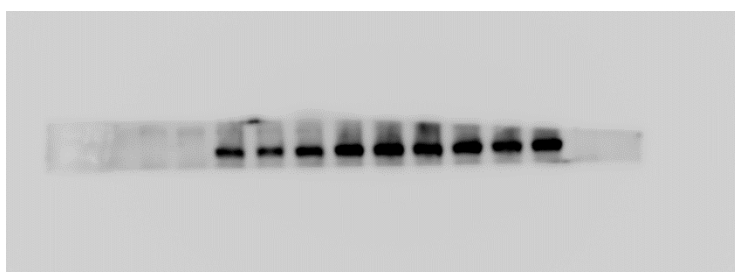

FOXO1

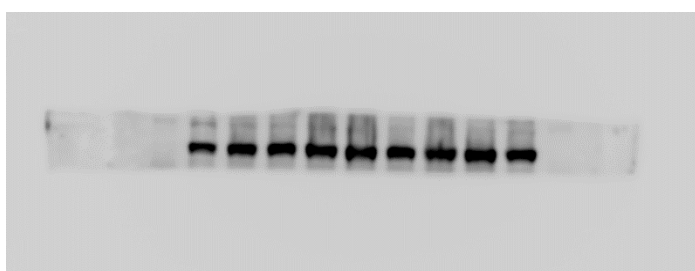

Figure 3H

Muscle

Actin:

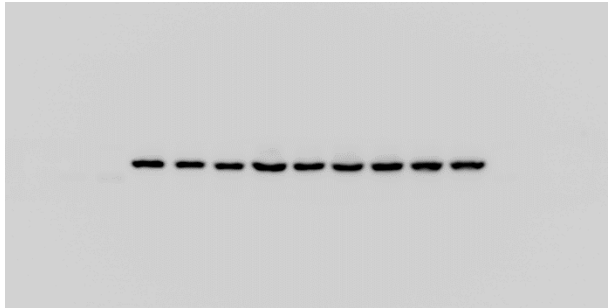

AKT:

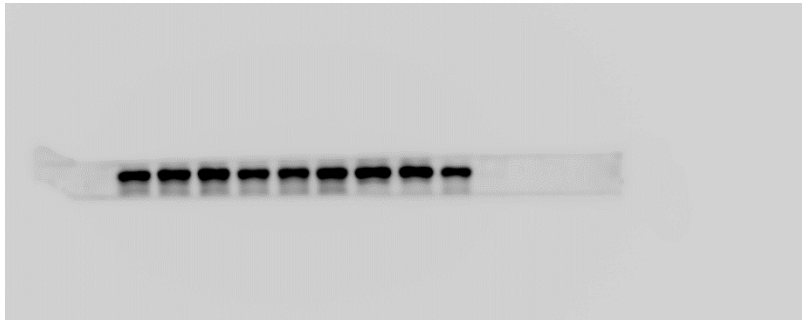

P-AKT:

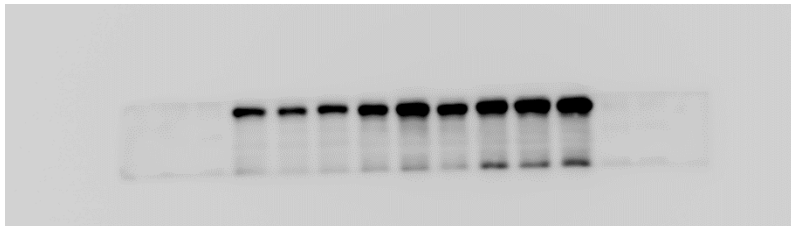

eWAT

Actin:

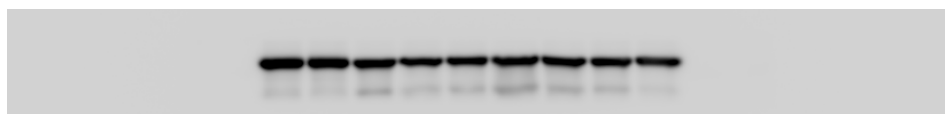

AKT:

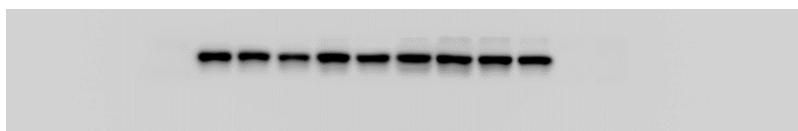

P-AKT:

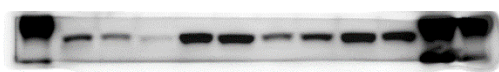

Figure 4B

KLF9

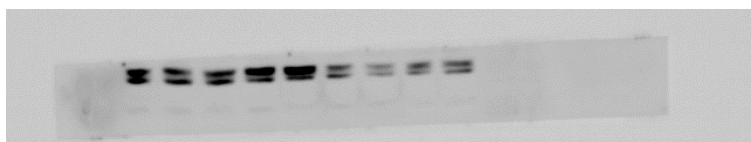

PGC1- $\alpha$

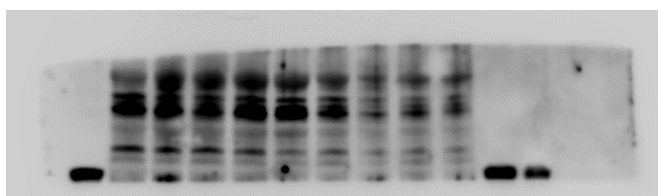

Actin

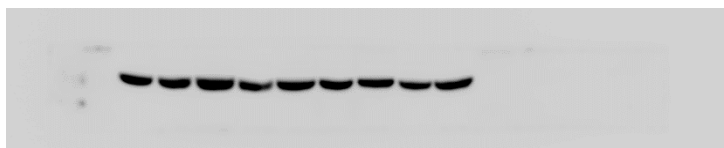

Figure 4D

KLF9

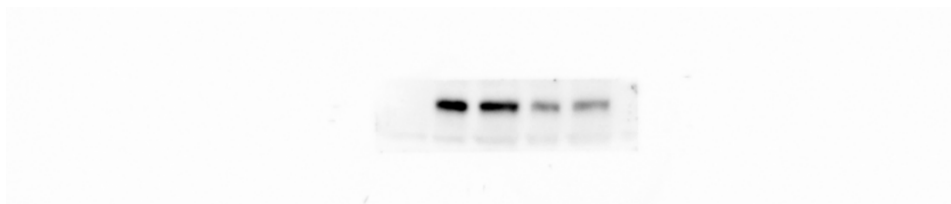

Actin

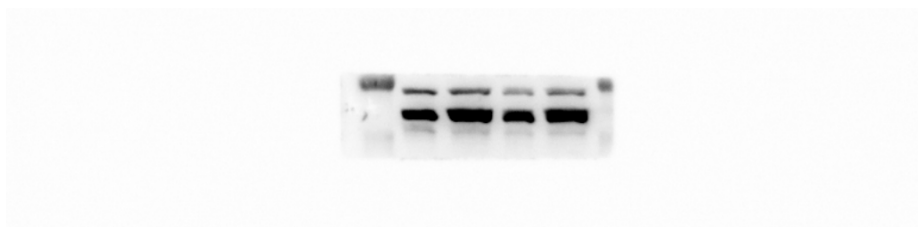

Figure 5J

PGC1- $\alpha$

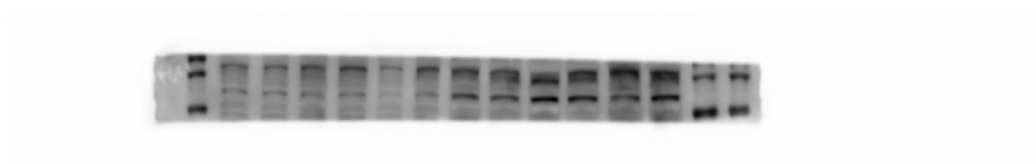

KLF9

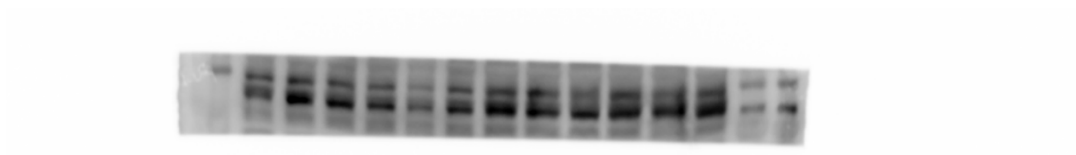

Actin

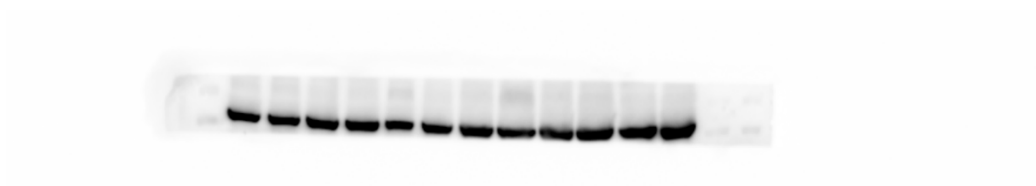

Figure 6A

GR

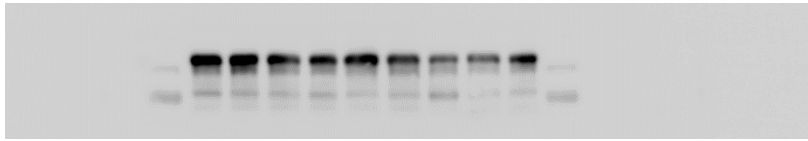

Actin

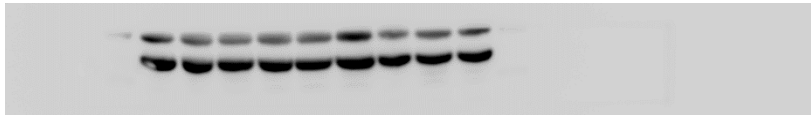

Figure 6D

1W GR

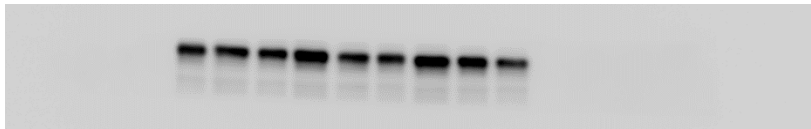

1W Actin

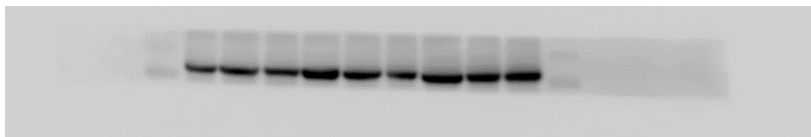

2W GR

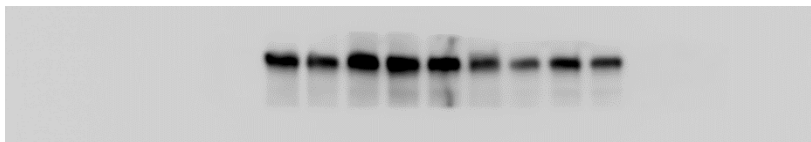

2W Actin

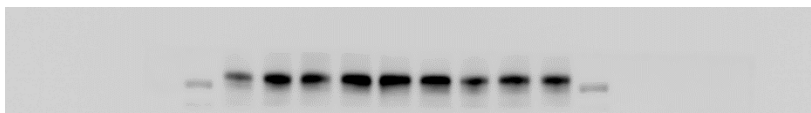



3W GR

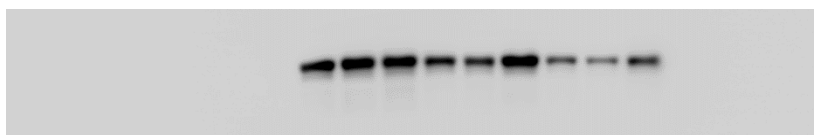

3W Actin

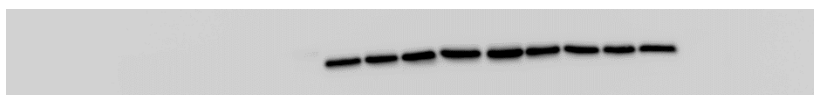

Figure 6F

UB-IP GR

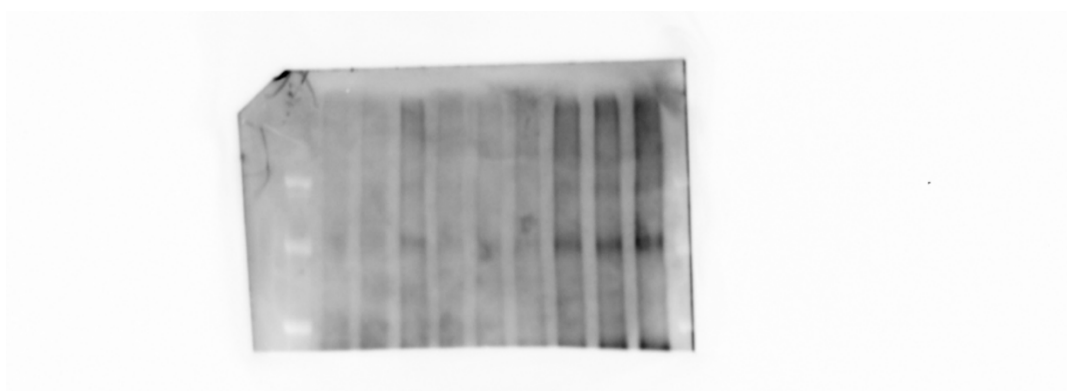

Input GR

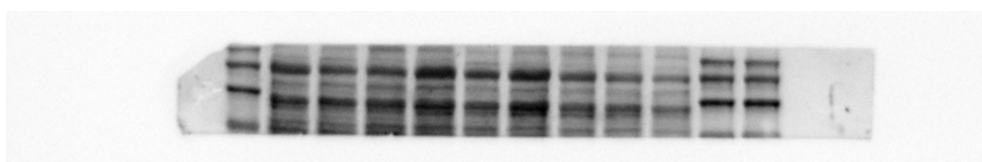

Figure 6G

eWAT

GR

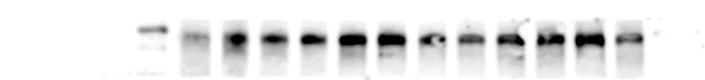

Actin

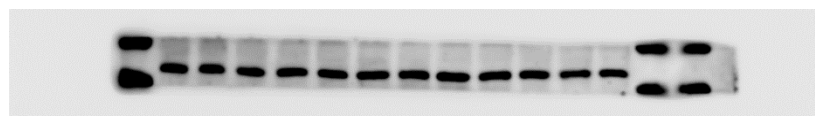

Muscle

GR

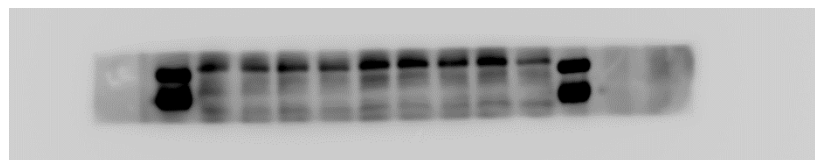

Actin

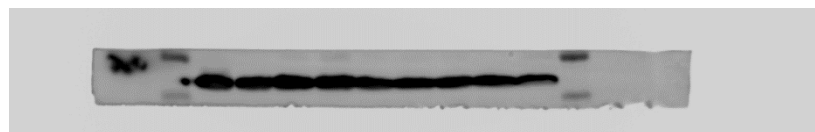

Figure S2A

HE

DB-AL

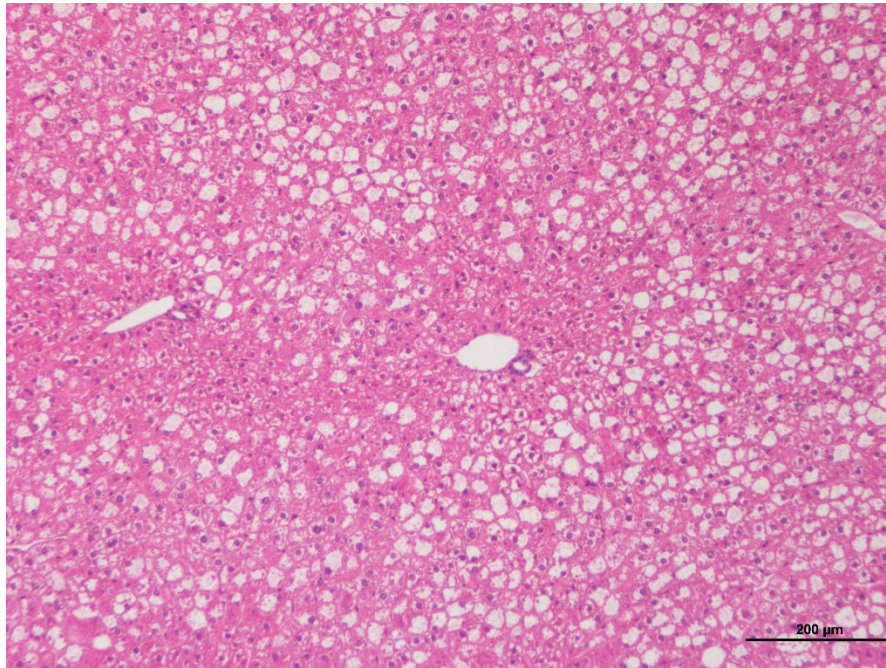

DB-MF

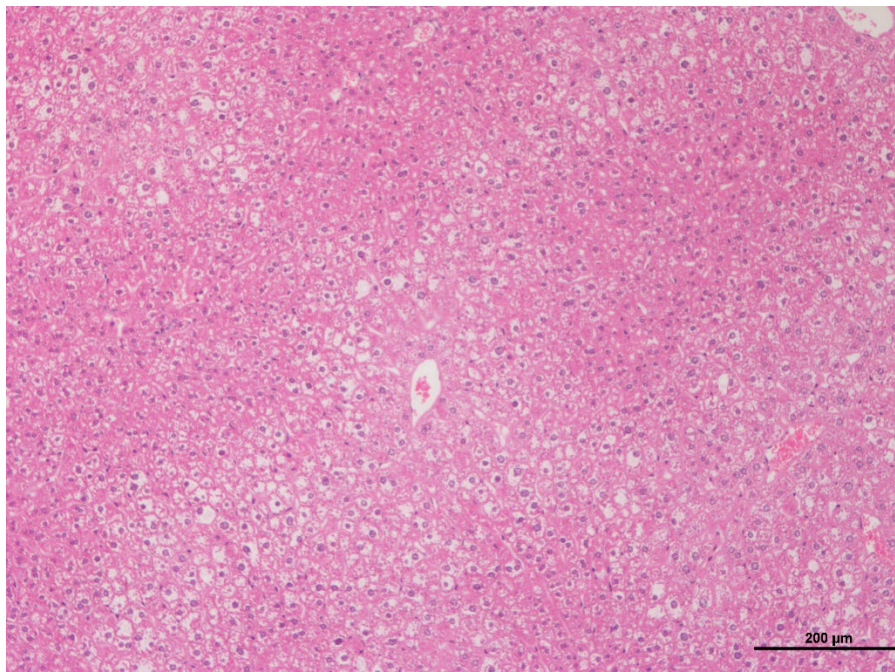

DB-EODF

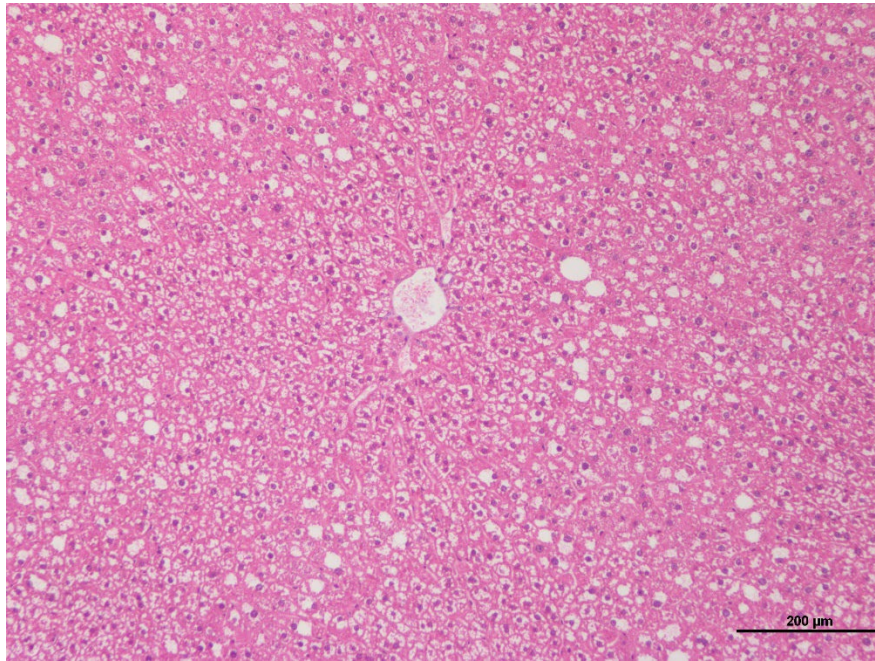



Figure S2A

ORO

DB-AL

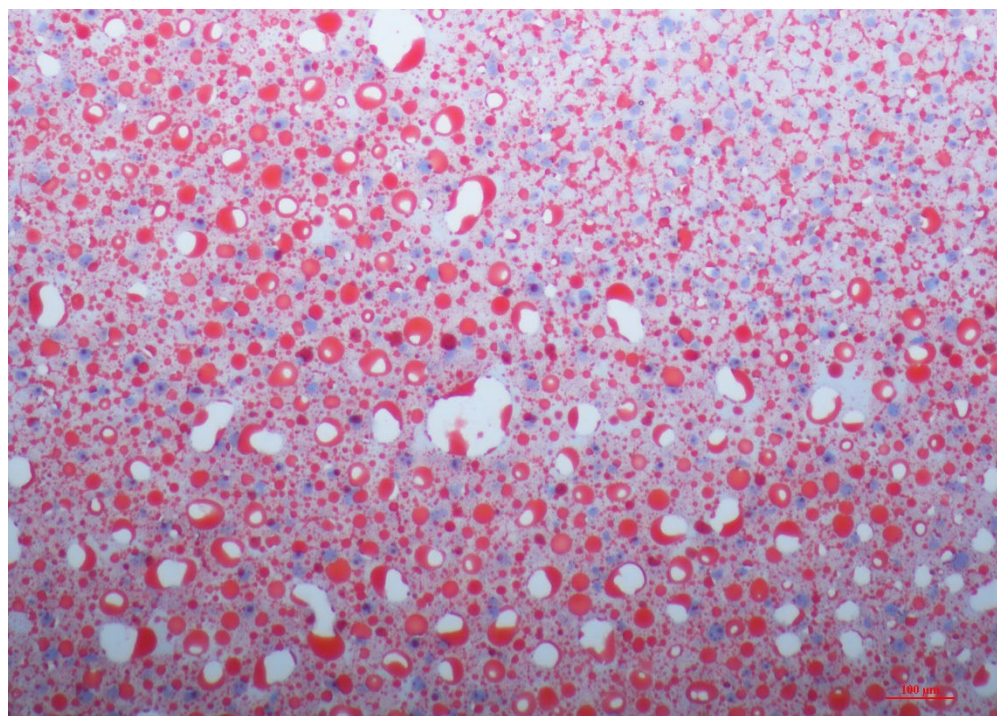

DB-MF

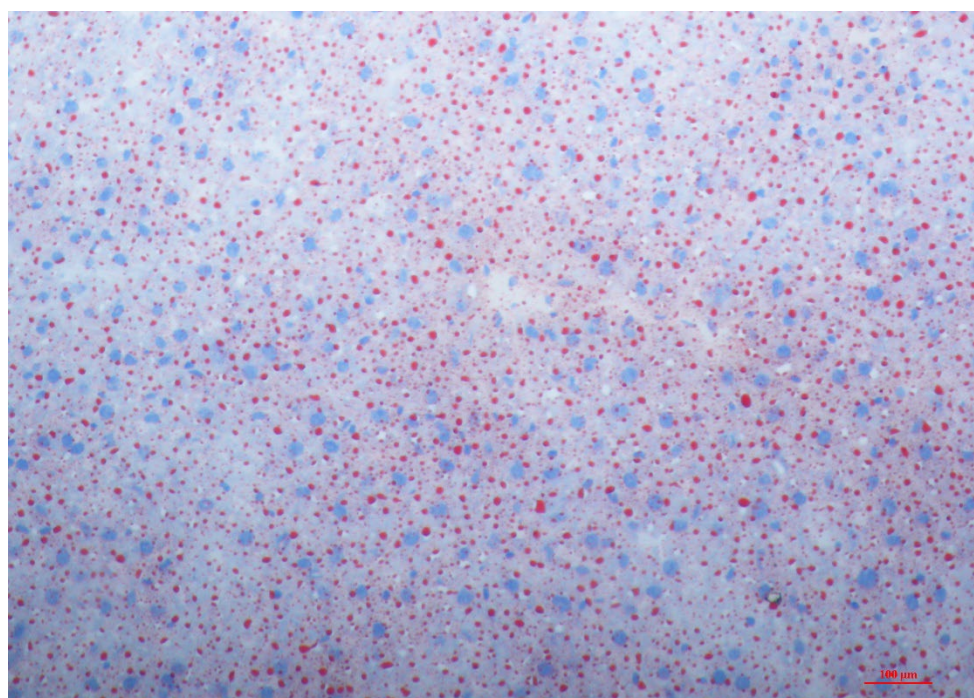



DB-IF

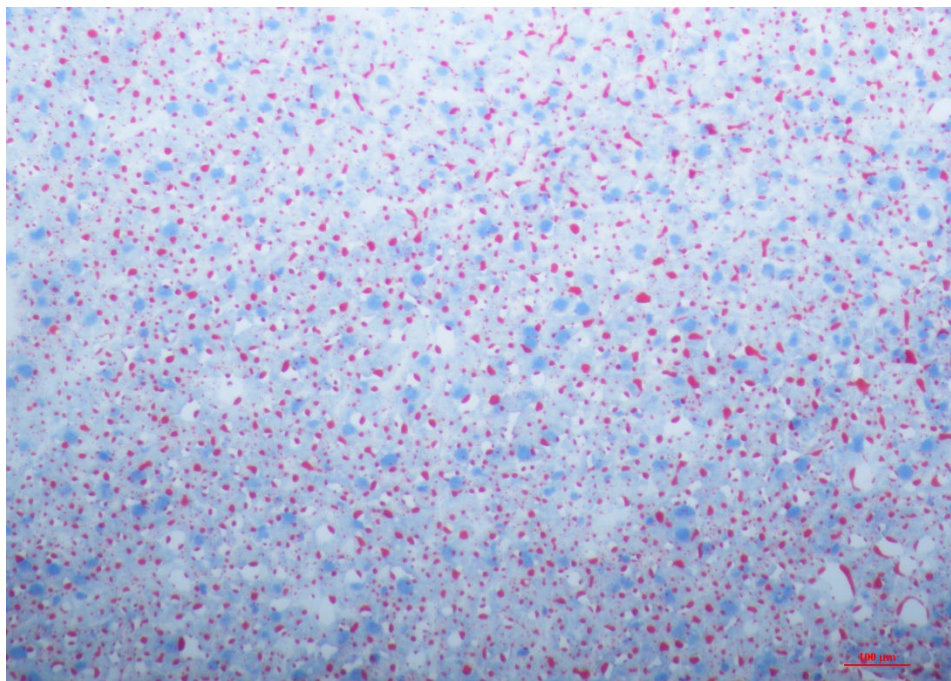

Supplement: Supplementary file 4 [file 1]
