# Supplementary material
Source: publisher figshare collection journal article supplement (https://diabetesjournals.figshare.com/articles/dataset/_/25418539)
Supplement: Supplementary file 3 [file 1]

Table S1. Reagent

| Reagent                     | Source                                     | Identifier       |
|-----------------------------|--------------------------------------------|------------------|
| Triglyceride assay kit      | Nanjing Jiancheng Bioengineering Institute | Cat: A110-2-1    |
| Total cholesterol assay kit | Nanjing Jiancheng Bioengineering Institute | Cat: A111-2-1    |
| Glycogen ELISA kit          | MEI MIAN                                   | Cat:MM-44379M1   |
| Insulin ELISA kit           | Elabscience                                | Cat: E-EL-M1382c |
| Glucocorticoid ELISA kit    | MEI MIAN                                   | Cat: MM-44378M1  |
| FT3 ELISA kit               | MEI MIAN                                   | Cat: MM-0577M1   |
| PEPCK activity kit          | Cominbio                                   | Cat: PEPCK-1-Y   |
| G6pc ELISA kit              | MEI MIAN                                   | Cat: MM-0739M1   |

Table S2. Primer sequences

| Gene        | Primer  | Sequence                |
|-------------|---------|-------------------------|
| <i>Actb</i> | Forward | GTGACGTTGACATCCGTAAAGA  |
|             | Reverse | GCCGGACTCATCGTACTCC     |
| <i>G6pc</i> | Forward | GACTGGTTCAACCTCGTCTTC   |
|             | Reverse | GTCTCACAGGTGACAGGGAAC   |
| <i>Pck1</i> | Forward | CAGGATCGAAAGCAAGACAGT   |
|             | Reverse | AAGTCCTCTTCCGACATCCAG   |
| <i>Pygl</i> | Forward | GAGAAGCGACGGCAGATCAG    |
|             | Reverse | CTTGACCAGAGTGAAGTGCAG   |
| <i>Gys2</i> | Forward | CGCTCCTTGTCGGTGACATC    |
|             | Reverse | CATCGGCTGTCGTTTTGGC     |
| <i>Fasn</i> | Forward | CACAGTGCTCAAAGGACATGCC  |
|             | Reverse | CACCAGGTGTAGTGCCTTCCTC  |
| <i>Acc1</i> | Forward | GTTCTGTTGGACAACGCCTTCAC |
|             | Reverse | GGAGTCACAGAAGCAGCCCATT  |
| <i>Cd36</i> | Forward | ATGGGCTGTGATCGGAACTG    |

---

|                 |         |                         |
|-----------------|---------|-------------------------|
|                 | Reverse | GTCTTCCCAATAAGCATGTCTCC |
| <i>Pparg</i>    | Forward | GTACTGTCGGTTTCAGAAGTGCC |
|                 | Reverse | ATCTCCGCCAACAGCTTCTCCT  |
| <i>Ppara</i>    | Forward | CAGAGGTCCGATTCTTCCAC    |
|                 | Reverse | GATCAGCATCCCGTGTTTGT    |
| <i>Acaa1a</i>   | Forward | ACGCATCGCCCAATTTCTGA    |
|                 | Reverse | CCAGACAGGGACATGGACTC    |
| <i>Acox1</i>    | Forward | TAACTTCCTCACTCGAAGCCA   |
|                 | Reverse | AGTTCCATGACCCATCTCTGTC  |
| <i>Ehhadh</i>   | Forward | ATGGCTGAGTATCTGAGGCTG   |
|                 | Reverse | ACCGTATGGTCCAAACTAGCTT  |
| <i>Atgl</i>     | Forward | ATGTTCCCGAGGGAGACCAA    |
|                 | Reverse | GAGGCTCCGTAGATGTGAGTG   |
| <i>Hsl</i>      | Forward | GATTTACGCACGATGACACAGT  |
|                 | Reverse | ACCTGCAAAGACATTAGACAGC  |
| <i>Apob</i>     | Forward | GCTCAACTCAGGTTACCGTGA   |
|                 | Reverse | AGGGTGTACTGGCAAGTTTGG   |
| <i>Apoe</i>     | Forward | CTCCCAAGTCACACAAGAAGTG  |
|                 | Reverse | CCAGCTCCTTTTTGTAAGCCTTT |
| <i>GR</i>       | Forward | TTCGCAGGCCGCTCAGTGTT    |
|                 | Reverse | AGGTGGTCCCGTTGCTGTGGA   |
| <i>Klf9</i>     | Forward | CGAGCGGCTGCGACTACCTG    |
|                 | Reverse | GGGCTGTGGGAAGGACTCGAC   |
| <i>Klf10</i>    | Forward | AGCTGCGACTGGAAGTCTCA    |
|                 | Reverse | CCTCGGAGGTATCAGACACTG   |
| <i>Klf15</i>    | Forward | GGCAGTGGAGGTATTGGAGAT   |
|                 | Reverse | GGTCCCTGCTACCGTTCTCT    |
| <i>Ppargc1a</i> | Forward | TCGATGTGTCGCCTTCTTGC    |
|                 | Reverse | ACGAGAGCGCATCCTTTGG     |

---

Table S3. Primer Antibody

| Antibody  | Source      | Identifier      | Dilution          |
|-----------|-------------|-----------------|-------------------|
| PYGL      | Proteintech | Cat: 15851-1-AP | WB: 1:1000        |
| GYS2      | Proteintech | Cat: 22371-1-AP | WB: 1:1000        |
| GR        | Proteintech | Cat: 24050-1-AP | WB: 1:1000        |
|           |             |                 | IP: 1.0 µg for IP |
| Ubiquitin | Proteintech | Cat: 10201-2-AP | WB: 1:1000        |
| KLF9      | Abclonal    | Cat: A7196      | WB: 1:1000        |
| IRS-1     | CST         | Cat: 3407T      | WB: 1:1000        |
| FoxO1     | Abcam       | Cat: ab179450   | WB: 1:1000        |
| p-FoxO1   | CST         | Cat: 9461T      | WB: 1:1000        |
| AKT       | CST         | Cat: 4691T      | WB: 1:1000        |
| p-AKT     | CST         | Cat: 4060T      | WB: 1:1000        |
| FGF21     | Abcam       | Cat: ab171941   | WB: 1:1000        |
| Actin     | Abmart      | Cat: T40104     | WB: 1:5000        |
